# Supplementary material for: The Efficacy of Physical Activity for Children with Attention Deficit Hyperactivity Disorder: A Meta-Analysis of Randomized Controlled Trials
Source: PubMed Central journal article supplement — J Atten Disord. 2021 May 27;26(5):656–73. doi: 10.1177/10870547211017982 (PMC8785285; doi:10.1177/10870547211017982), 2021-05-27
Supplement: sj-pdf-1-jad-10.1177_10870547211017982.pdf [file sj-pdf-1-jad-10.1177_10870547211017982.pdf]

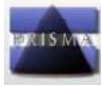

# PRISMA 2009 Checklist

## Online Ressource 1. PRSIMA checklist

| Section/topic                      | #  | Checklist item                                                                                                                                                                                                                                                                                              | Reported on page # |
|------------------------------------|----|-------------------------------------------------------------------------------------------------------------------------------------------------------------------------------------------------------------------------------------------------------------------------------------------------------------|--------------------|
| <b>TITLE</b>                       |    |                                                                                                                                                                                                                                                                                                             |                    |
| Title                              | 1  | Identify the report as a systematic review, meta-analysis, or both.                                                                                                                                                                                                                                         | 1                  |
| <b>ABSTRACT</b>                    |    |                                                                                                                                                                                                                                                                                                             |                    |
| Structured summary                 | 2  | Provide a structured summary including, as applicable: background; objectives; data sources; study eligibility criteria, participants, and interventions; study appraisal and synthesis methods; results; limitations; conclusions and implications of key findings; systematic review registration number. | 1                  |
| <b>INTRODUCTION</b>                |    |                                                                                                                                                                                                                                                                                                             |                    |
| Rationale                          | 3  | Describe the rationale for the review in the context of what is already known.                                                                                                                                                                                                                              | 2-4                |
| Objectives                         | 4  | Provide an explicit statement of questions being addressed with reference to participants, interventions, comparisons, outcomes, and study design (PICOS).                                                                                                                                                  | 4                  |
| <b>METHODS</b>                     |    |                                                                                                                                                                                                                                                                                                             |                    |
| Protocol and registration          | 5  | Indicate if a review protocol exists, if and where it can be accessed (e.g., Web address), and, if available, provide registration information including registration number.                                                                                                                               | 5                  |
| Eligibility criteria               | 6  | Specify study characteristics (e.g., PICOS, length of follow-up) and report characteristics (e.g., years considered, language, publication status) used as criteria for eligibility, giving rationale.                                                                                                      | 4-5                |
| Information sources                | 7  | Describe all information sources (e.g., databases with dates of coverage, contact with study authors to identify additional studies) in the search and date last searched.                                                                                                                                  | 5                  |
| Search                             | 8  | Present full electronic search strategy for at least one database, including any limits used, such that it could be repeated.                                                                                                                                                                               | Online Resource 2  |
| Study selection                    | 9  | State the process for selecting studies (i.e., screening, eligibility, included in systematic review, and, if applicable, included in the meta-analysis).                                                                                                                                                   | 5-6                |
| Data collection process            | 10 | Describe method of data extraction from reports (e.g., piloted forms, independently, in duplicate) and any processes for obtaining and confirming data from investigators.                                                                                                                                  | 6                  |
| Data items                         | 11 | List and define all variables for which data were sought (e.g., PICOS, funding sources) and any assumptions and simplifications made.                                                                                                                                                                       | 6-7                |
| Risk of bias in individual studies | 12 | Describe methods used for assessing risk of bias of individual studies (including specification of whether this was done at the study or outcome level), and how this information is to be used in any data synthesis.                                                                                      | 6-7                |
| Summary measures                   | 13 | State the principal summary measures (e.g., risk ratio, difference in means).                                                                                                                                                                                                                               | 7-8                |
| Synthesis of results               | 14 | Describe the methods of handling data and combining results of studies, if done, including measures of consistency (e.g., $I^2$ ) for each meta-analysis.                                                                                                                                                   | 7-8                |

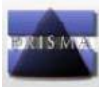

# PRISMA 2009 Checklist

| Section/topic                 | #  | Checklist item                                                                                                                                                                                 |
|-------------------------------|----|------------------------------------------------------------------------------------------------------------------------------------------------------------------------------------------------|
| Risk of bias across studies   | 15 | Specify any assessment of risk of bias that may affect the cumulative evidence (e.g., publication bias, studies).                                                                              |
| Additional analyses           | 16 | Describe methods of additional analyses (e.g., sensitivity or subgroup analyses, meta -regression), if done pre-specified.                                                                     |
| <b>RESULTS</b>                |    |                                                                                                                                                                                                |
| Study selection               | 17 | Give numbers of studies screened, assessed for eligibility, and included in the review, with reasons for exclusions ideally with a flow diagram.                                               |
| Study characteristics         | 18 | For each study, present characteristics for which data were extracted (e.g., study size, PICOS, follow-up time, citations).                                                                    |
| Risk of bias within studies   | 19 | Present data on risk of bias of each study and, if available, any outcome level assessment (see item 12).                                                                                      |
| Results of individual studies | 20 | For all outcomes considered (benefits or harms), present, for each study: (a) simple summary data for each outcome, (b) effect estimates and confidence intervals, ideally with a forest plot. |
| Synthesis of results          | 21 | Present results of each meta-analysis done, including confidence intervals and measures of consistency (e.g., I <sup>2</sup> ).                                                                |
| Risk of bias across studies   | 22 | Present results of any assessment of risk of bias across studies (see Item 15).                                                                                                                |
| Additional analysis           | 23 | Give results of additional analyses, if done (e.g., sensitivity or subgroup analyses, meta -regression [see item 16]).                                                                         |
| <b>DISCUSSION</b>             |    |                                                                                                                                                                                                |
| Summary of evidence           | 24 | Summarize the main findings including the strength of evidence for each main outcome; consider their relevance to key stakeholders (e.g., healthcare providers, users, and policy makers).     |
| Limitations                   | 25 | Discuss limitations at study and outcome level (e.g., risk of bias), and at review-level (e.g., incomplete search, reporting bias).                                                            |
| Conclusions                   | 26 | Provide a general interpretation of the results in the context of other evidence, and implications for future research.                                                                        |
| <b>FUNDING</b>                |    |                                                                                                                                                                                                |
| Funding                       | 27 | Describe sources of funding for the systematic review and other support (e.g., supply of data); role of funding sources in the design, conduct, or reporting of the review.                    |

From: Moher D, Liberati A, Tetzlaff J, Altman DG, The PRISMA Group (2009). Preferred Reporting Items for Systematic Reviews and Meta-Analyses: The PRISMA Statement. PLoS Med 6(7): e1000097. doi:10.1371/journal.pmed1000097

For more information, visit: [www.prisma-statement.org](http://www.prisma-statement.org).

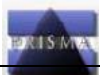

# PRISMA 2009 Checklist

- 1 "Attention Deficit Disorder with Hyperactivity"[Mesh]OR Attention Deficit Disorders with Hyperactivity[tiab]OR Attention Deficit Hyperactivity Disorder\*[tiab] OR Hyperkinetic Syndrome\*[tiab]OR ADDH[tiab] OR ADHD[tiab] OR Attention Deficit Disorder\*[tiab] OR ADD[tiab] OR Hyperactivit\*[tiab]OR Inattention[tiab]OR Impulsivit\*[tiab]
- 2 "Exercise"[Mesh] OR "Sports"[Mesh] OR Exercise\*[tiab] OR Physical Activit\*[tiab] OR Physical Exercise\*[tiab] OR Isometric Exercise\*[tiab] OR Aerobic Exercise\*[tiab] OR Exercise Training\*[tiab] OR Sport\*[tiab] OR Movement[tiab]OR Workout\*[tiab] OR Physical Training\*[tiab] OR Energy expenditure[tiab]OR Athletic\*[tiab]
- 3 "Child"[Mesh] OR "Adolescent"[Mesh] OR "Young Adult"[Mesh] "Minor"[Mesh] OR Adolescen\*[tiab] OR Teen\*[tiab]OR Teenager\*[tiab] OR Youth\*[tiab]OR "Minors"[Mesh] OR Minor\*[tiab] OR "Child"[Mesh] OR Child\*[tiab] OR Kid[tiab] OR Kids[tiab] OR Girl\*[tiab] OR Boy\*[tiab]OR Under age\*[tiab]OR Underage\*[tiab] OR Young people[tiab]OR young person[tiab] OR Prepubescen\*[tiab] OR Pubescen\*[tiab]OR Young Adult\*[tiab]
- 4 #1 AND #2 AND #3

## Supplement 3: Sensitivity Analyses

### A. Seperate Analysis for Inattentive and Hyperactive Symptoms

#### Inattentive

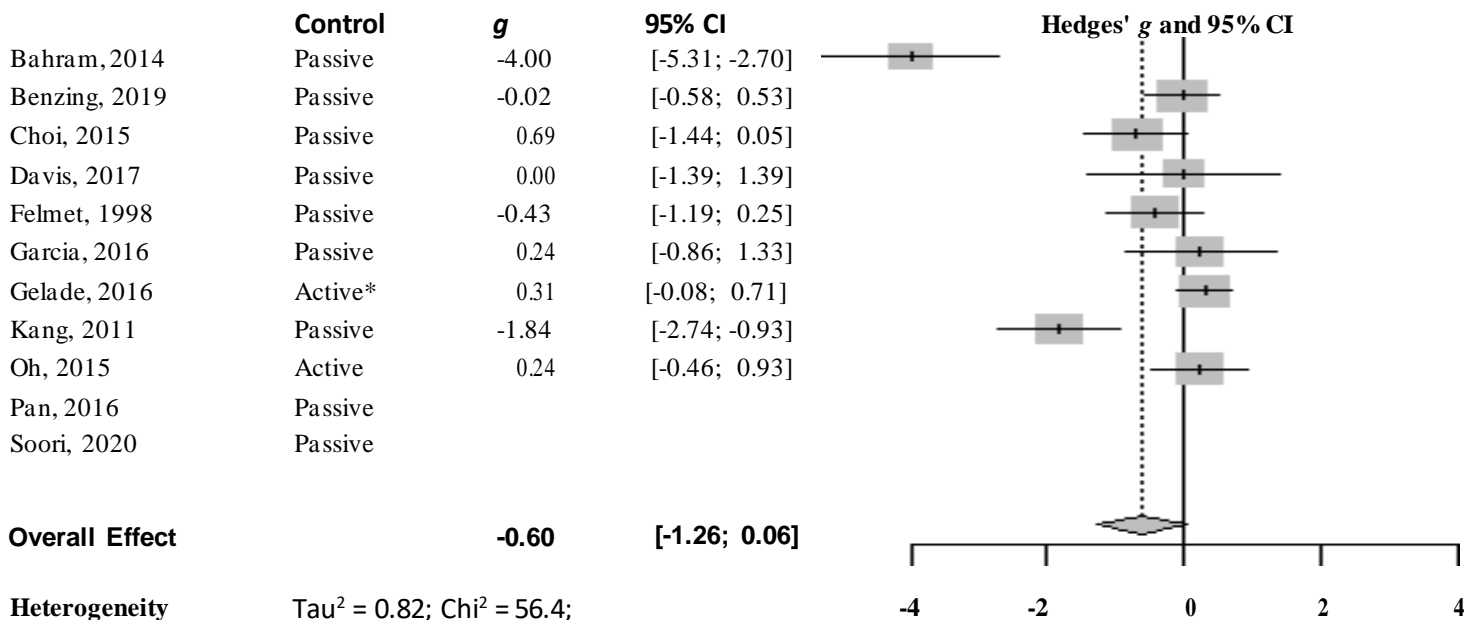

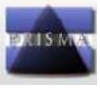

# PRISMA 2009 Checklist

df = 8 ( $p = 0.000$ );  $I^2 = 85.8\%$

Publication Bias

Egger's intercept = -4.22 ( $p = 0.070$ )

Favours MVPA  
Intervention

Favours  
Control

Note.  $G$  = Hedges'  $g$  ; CI: Confidence Interval;  $p$ :  $p$ -Score; MVPA: moderate to vigorous physical activity

## Hyperactive

|                       | Control | $g$          | 95% CI               |
|-----------------------|---------|--------------|----------------------|
| Bahram, 2014          | Passive | -0.77        | [-1.52; -0.03]       |
| Benzing, 2019         | Passive | -0.28        | [-0.83; 0.28]        |
| Choi, 2015            | Passive | -0.81        | [-1.56; -0.05]       |
| Davis, 2017           | Passive | -0.38        | [-1.79; 1.03]        |
| Felmet, 1998          | Passive | -0.22        | [-0.90; 0.45]        |
| Garcia, 2016          | Passive | 0.25         | [-0.85; 1.35]        |
| Gelade, 2016          | Active* | 0.28         | [-0.11; 0.69]        |
| Kang, 2011            | Passive | -0.63        | [-1.40; 0.14]        |
| Oh, 2015              | Active  | -0.06        | [-0.75; 0.64]        |
| Pan, 2016             | Passive |              |                      |
| Soori, 2020           | Passive |              |                      |
| <b>Overall Effect</b> |         | <b>-0.25</b> | <b>[-0.54; 0.05]</b> |

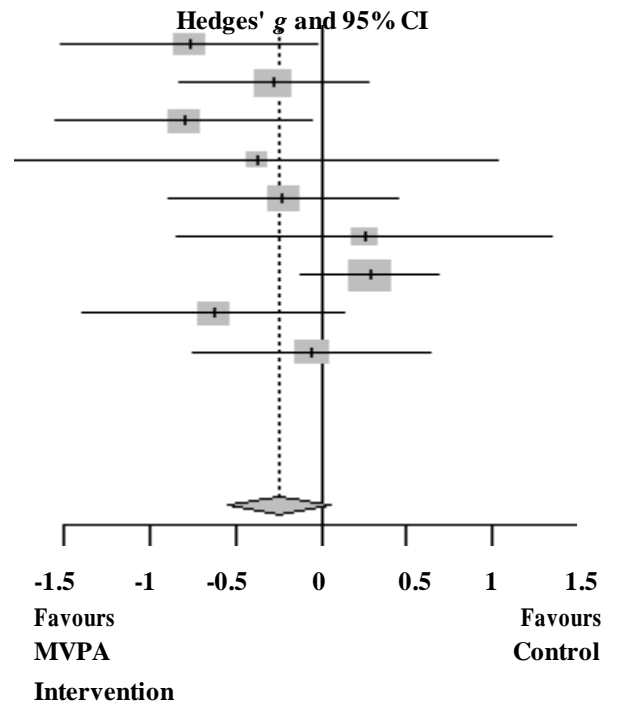

Heterogeneity

$Tau^2 = 0.07$ ;  $Chi^2 = 12.58$ ;  
df = 8 ( $p = 0.127$ );  $I^2 = 36.4\%$

Publication Bias

Egger's intercept = -1.91 ( $p = 0.145$ )

Note.  $G$  = Hedges'  $g$  ; CI: Confidence Interval;  $p$ :  $p$ -Score; MVPA: moderate to vigorous physical activity

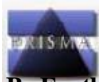

# PRISMA 2009 Checklist

## B. Further Subgroup Analyses

|                 | Subgroup            | Effectsize and |              |                |              | Heterogeneity    |                  |    |       |                    |
|-----------------|---------------------|----------------|--------------|----------------|--------------|------------------|------------------|----|-------|--------------------|
|                 |                     | n              | g            | 95% CI         | p            | Tau <sup>2</sup> | Chi <sup>2</sup> | df | p     | I <sup>2</sup> (%) |
| <b>Assessor</b> | blinded             | 3              | <b>-0.93</b> | [-1.45; -0.41] | <b>0.000</b> | 0                | 1.96             | 2  | 0.375 | 0.0                |
|                 | non-blinded         | 8              | -0.16        | [-0.44; 0.12]  | 0.259        | 0.06             | 10.77            | 7  | 0.149 | 35.0               |
| <b>Trainer</b>  | professional        | 6              | -0.46        | [-0.89; -0.03] | 0.037        | 0.13             | 9.21             | 5  | 0.101 | 45.7               |
|                 | parent/investigator | 5              | -0.18        | [-0.60; 0.23]  | 0.386        | 0.11             | 8.36             | 4  | 0.079 | 52.2               |
| <b>Delivery</b> | group-based         | 9              | <b>-0.42</b> | [-0.72; -0.12] | <b>0.007</b> | 0.06             | 11.52            | 8  | 0.174 | 30.5               |
|                 | individual          | 2              | -0.04        | [-0.81; 0.73]  | 0.914        | 0.23             | 3.71             | 1  | 0.054 | 73.0               |

Note: n = number of studies; g = Hedges's g; CI = confidence interval, p = p-Score, df = degrees of freedom

\* significantly different to comparison group: confidence intervals do not overlap

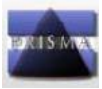

# PRISMA 2009 Checklist

## C. Meta Regression including Age, Sex and Medication Status

|                   |                  | beta  | SE   | 95% CI         | z     | p     | n     | QM    | df | R <sup>2</sup> |
|-------------------|------------------|-------|------|----------------|-------|-------|-------|-------|----|----------------|
| <b>Age</b>        | Intercept        | 1.02  | 0.45 | [0.15; 1.90]   | 2.28  | 0.022 |       |       |    |                |
|                   | age              | -0.13 | 0.05 | [-0.23; -0.05] | -2.96 | 0.003 |       |       |    |                |
|                   | <i>Model Fit</i> |       |      |                |       | 0.003 | 11    | 8.77  | 1  | 88.67%         |
| <b>Gender</b>     | Intercept        | -0.39 | 0.44 | [-1.30; 0.52]  | -0.84 | 0.403 |       |       |    |                |
|                   | gender (% male)  | 0.00  | 0.01 | [-0.01; 0.01]  | 0.13  | 0.895 |       |       |    |                |
|                   | <i>Model Fit</i> |       |      |                | 0.895 | 11    | 0.017 | 0.00% |    |                |
| <b>Medication</b> | Intercept        | -0.10 | 0.21 | [-0.52; 0.32]  | 0.47  | 0.639 |       |       |    |                |
|                   | % medicated      | -0.01 | 0.00 | [-0.01; 0.00]  | -1.69 | 0.09  |       |       |    |                |
|                   | <i>Model Fit</i> |       |      |                | 0.09  | 9     | 2.85  |       |    | 38.80%         |

Key to abbreviations. SE: standard error; z: z-score; p: p-score; n = number of included effect sizes; df: degrees of freedom

### Plots of univariate meta-regressions:

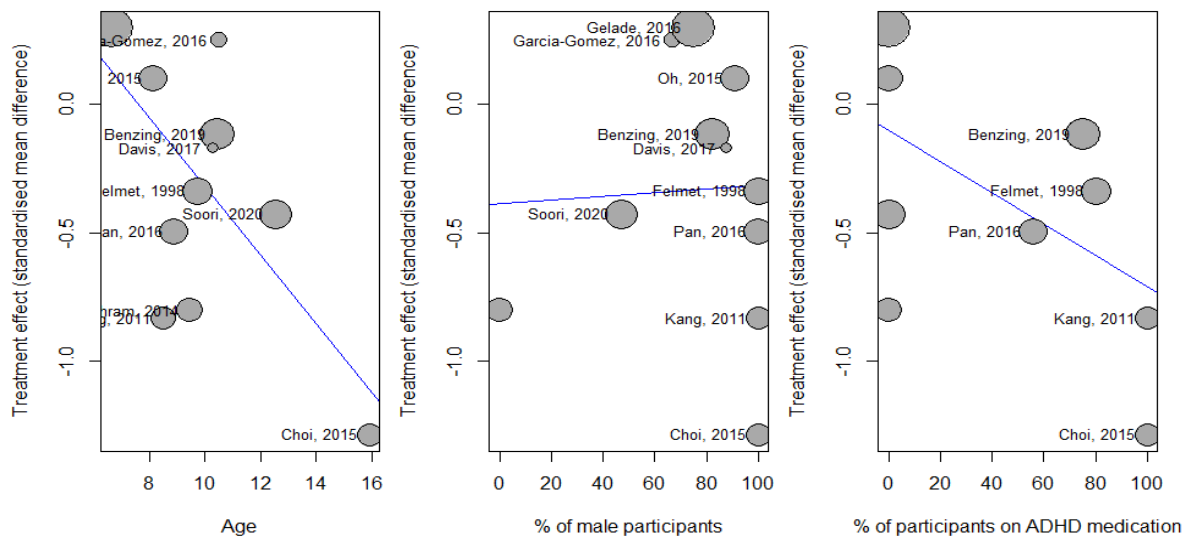

### Univariate meta-regression analysis: removed data-point with high leverage (Choi et al., 2015)

|            |                  | beta  | SE   | 95% CI        | z     | p     | n  | QM   | df   | R <sup>2</sup> |
|------------|------------------|-------|------|---------------|-------|-------|----|------|------|----------------|
| <b>Age</b> | Intercept        | 0.74  | 0.63 | [-0.50; 1.99] | 1.17  | 0.243 |    |      |      |                |
|            | age              | -0.10 | 0.07 | [-0.24; 0.03] | -1.51 | 0.130 |    |      |      |                |
|            | <i>Model Fit</i> |       |      |               |       | 0.130 | 10 | 2.29 | 1.00 | 55.07%         |

Key to abbreviations. SE: standard error; z: z-score; p: p-score; n = number of included effect sizes; df: degrees of freedom

Supplement 4: Studies included in meta-analyses Cerrillo-Urbina et al. (2015); Zang (2019), but excluded in this systematic review and meta-analysis



# PRISMA 2009 Checklist

## **Exclusion due to non-randomized design:**

- Verret, Gardiner, and Beliveau (2010) (+ acute exercise intervention)
- Verret, Guay, Berthiaume, Gardiner, and Beliveau (2012)
- McKune, Pautz, and Lombard (2003)

## **Exclusion due to implementation of single bouts of MVPA:**

- Chang, Liu, Yu, and Lee (2012)
- Fritz and O'Connor (2016) Pontifex, 2013
- Tantillo, Kesick, Hynd, and Dishman (2002)

## **Exclusion due to lack of outcome measure of ADHD core symptoms:**

- Chou and Huang (2017)
- Pan, Chang, Tsai, and Chu (2014)
- Da Silva et al. (2019)
- Memarmoghaddam, Torbati, Sohrabi, Mashhadi, and Kashi (2016)

## **Exclusion due to lack of fulfilled clinical diagnosis of full ADHD symptom criteria:**

- Hoza et al. (2015)

## **Exclusion due to intervention provided less than twice per week:**

- Jensen and Kenny (2004)

## **Exclusion due to lack of adequate control group:**

- Kadri, Slimani, Bragazzi, Tod, and Azaiez (2019)

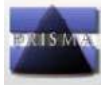

# PRISMA 2009 Checklist

## References

- Cerrillo-Urbina, A. J., Garcia-Hermoso, A., Sanchez-Lopez, M., Pardo-Guijarro, M. J., Santos Gomez, J. L., & Martinez-Vizcaino, V. (2015). The effects of physical exercise in children with attention deficit hyperactivity disorder: a systematic review and meta-analysis of randomized control trials. *Child Care Health Dev*, 41(6), 779-788. doi:10.1111/cch.12255
- Chang, Y. K., Liu, S. Y., Yu, H. H., & Lee, Y. H. (2012). Effect of acute exercise on executive function in children with attention deficit hyperactivity disorder. *Archives of Clinical Neuropsychology*, 27(2), 225-237. doi:10.1093/arclin/acr094
- Chou, C. C., & Huang, C. J. (2017). Effects of an 8-week yoga program on sustained attention and discrimination function in children with attention deficit hyperactivity disorder. *PeerJ*, 5, e2883. doi:10.7717/peerj.2883
- Da Silva, L. A., Doyenart, R., Henrique Salvan, P., Rodrigues, W., Felipe Lopes, J., Gomes, K., . . . Silveira, P. C. (2019). Swimming training improves mental health parameters, cognition and motor coordination in children with Attention Deficit Hyperactivity Disorder. *International Journal of Environmental Health Research*. doi:<http://dx.doi.org/10.1080/09603123.2019.1612041>
- Fritz, K. M., & O'Connor, P. J. (2016). Acute Exercise Improves Mood and Motivation in Young Men with ADHD Symptoms. *Medicine and Science in Sports and Exercise*, 48(6), 1153-1160. doi:10.1249/MSS.0000000000000864
- B., Smith, A. L., Shoulberg, E. K., Linnea, K. S., Dorsch, T. E., Blazo, J. A., . . . McCabe, G. P. (2015). A randomized trial examining the effects of aerobic physical activity on attention-deficit/hyperactivity disorder symptoms in young children. *Journal of Abnormal Child Psychology*, 43(4), 655-667. doi:10.1007/s10802-014-9929-y
- , P. S., & Kenny, D. T. (2004). The effects of yoga on the attention and behavior of boys with Attention-Deficit/ hyperactivity Disorder (ADHD). *J Atten Disord*, 7(4), 205-216. doi:10.1177/108705470400700403
- Kadri, A., Slimani, M., Bragazzi, N. L., Tod, D., & Azaiez, F. (2019). Effect of Taekwondo Practice on Cognitive Function in Adolescents with Attention Deficit Hyperactivity Disorder. *International Journal of Environmental Research and Public Health*, 16(2), 204. doi:10.3390/ijerph16020204
- ne, A., Pautz, J., & Lombard, J. (2003). Behavioral response to exercise in children with attention deficit hyperactivity disorder. *South African Journal of Sports Medicine*, 15, 17-21. doi:10.17159/2413-3108/2003/v15i3a223
- rmoghaddam, M., Torbati, H. T., Sohrabi, M., Mashhadi, A., & Kashi, A. (2016). Effects of a selected exercise program on executive function of children with attention deficit hyperactivity disorder. *Journal of Medicine and Life*, 9(4), 373-379. doi:10.22336/jml.2016.0410
- . Y., Chang, Y. K., Tsai, C. L., & Chu, C. H. (2014). Effects of Exercise Intervention in Youths With Attention-Deficit Hyperactivity Disorder. *Res Q Exercise Sport*, 85, 83-84.
- o, M., Kesick, C. M., Hynd, G. W., & Dishman, R. K. (2002). The effects of exercise on children with attention-deficit hyperactivity disorder. *Medicine and Science in Sports and Exercise*, 34(2), 203-212. doi:10.1097/00005768-200202000-00004
- C., Gardiner, P., & Beliveau, L. (2010). Fitness level and gross motor performance of children with attention-deficit hyperactivity disorder. *Adapt Phys Activ Q*, 27(4), 337-351. doi:10.1123/apaq.27.4.337
- C., Guay, M. C., Berthiaume, C., Gardiner, P., & Beliveau, L. (2012). A physical activity program improves behavior and cognitive functions in children with ADHD: an exploratory study. *J Atten Disord*, 16(1), 71-80. doi:10.1177/1087054710379735
- Y. (2019). Impact of physical exercise on children with attention deficit hyperactivity disorders: Evidence through a meta-analysis. *Medicine (Baltimore)*, 98(46), e17980. doi:10.1097/MD.00000000000017980
